# Supplementary material for: The Usefulness of Serum Brain Damage Biomarkers in Detection and Evaluation of Hypoxic Ischemic Encephalopathy in Calves with Perinatal Asphyxia
Source: MDPI journal article supplement (doi:10.3390/ani12223223), 2022-11-21
Supplement: s1 [file s1]

## Supplementary materials

Supplementary Table S1. Hemogram variables of healthy and calves with perinatal asphyxia.

| Variable                    |                | Time of evaluation (hours)                            |                                                |                                                |                                                |
|-----------------------------|----------------|-------------------------------------------------------|------------------------------------------------|------------------------------------------------|------------------------------------------------|
|                             |                | Admission<br>(n <sub>H</sub> :10, n <sub>A</sub> :25) | 24<br>(n <sub>H</sub> :10, n <sub>A</sub> :12) | 48<br>(n <sub>H</sub> :10, n <sub>A</sub> :12) | 72<br>(n <sub>H</sub> :10, n <sub>A</sub> :12) |
| WBC<br>(m/mm <sup>3</sup> ) | Healthy        | 8.75 (5.44-13.04)                                     | 6.10 (4.23-9.12)                               | 5.39 (4.46-15.97)                              | 5.80 (4.74-11.40)                              |
|                             | Asphyxia       | 10.05 (1.90-42.84)                                    | 8.10 (4.99-9.70)                               | 9.78 (3.24-48.24)                              | 8.69 (5.05-23.64)                              |
|                             | <i>P value</i> |                                                       |                                                |                                                |                                                |
| RBC<br>(m/mm <sup>3</sup> ) | Healthy        | 7.68 (7.06-9.80)                                      | 7.39 (6.71-8.36)                               | 7.71 (5.26-9.42)                               | 7.76 (5.17-8.68)                               |
|                             | Asphyxia       | 7.91 (4.34-12.83)                                     | 7.35 (5.55-7.69)                               | 7.50 (4.91-9.90)                               | 6.91 (5.75-8.96)                               |
|                             | <i>P value</i> |                                                       |                                                |                                                |                                                |
| HCT<br>(%)                  | Healthy        | 33.15 (14.4-49.70)                                    | 29.60 (27.50-39.60)                            | 30.40 (21.40-37.80)                            | 32.35 (19.90-35.00)                            |
|                             | Asphyxia       | 33.50 (15.40-64.20)                                   | 30.60 (22.80-35.20)                            | 34.90 (14.70-40.70)                            | 31.30 (21.50-36.10)                            |
|                             | <i>P value</i> |                                                       |                                                |                                                |                                                |
| Hb<br>(g/dL)                | Healthy        | 9.15 (7.50-13.20)                                     | 9.90 (6.90-13.00)                              | 10.00 (5.60-12.20)                             | 9.55 (6.60-11.50)                              |
|                             | Asphyxia       | 10.60 (2.50-14.40)                                    | 7.10 (4.00-8.50)                               | 9.20 (5.40-13.00)                              | 7.25 (6.40-8.10)                               |
|                             | <i>P value</i> |                                                       |                                                |                                                |                                                |
| THR<br>(m/mm <sup>3</sup> ) | Healthy        | 189.00 (200-310)                                      | 184.50 (172-247)                               | 204.00 (143-384)                               | 295.50 (165-385)                               |
|                             | Asphyxia       | 172.00 (85-424)                                       | 131.00 (131-243)                               | 182 (123-404)                                  | 175.00 (141-285)                               |
|                             | <i>P value</i> |                                                       |                                                |                                                |                                                |

n<sub>H</sub>: number of calves included in the healthy group, n<sub>A</sub>: number of calves included in the asphyxia group, WBC (Total leukocyte), RBC (erythrocyte), HCT (hematocrit), Hb (hemoglobin), THR (thrombocyte).

Supplementary Table S2. Scores of histopathological lesions in nonsurvivo calves with perinatal asphyxia.

| Animal no. | INC | NF | Gliososis | MCI | Hyperemia | ECS | Edema | Hemorrhage | Total |
|------------|-----|----|-----------|-----|-----------|-----|-------|------------|-------|
| 1          | 2   | 2  | 2         | 2   | 4         | 2   | 2     | 2          | 18    |
| 2          | 1   | 1  | 2         | 1   | 4         | 1   | 2     | 0          | 13    |
| 3          | 3   | 3  | 3         | 0   | 2         | 1   | 3     | 2          | 17    |
| 4          | 2   | 2  | 3         | 1   | 2         | 1   | 2     | 0          | 13    |
| 5          | 3   | 3  | 3         | 2   | 3         | 2   | 3     | 2          | 21    |
| 6          | 3   | 3  | 3         | 1   | 4         | 3   | 3     | 2          | 22    |
| 7          | 3   | 4  | 4         | 1   | 4         | 3   | 3     | 1          | 23    |
| 8          | 1   | 2  | 2         | 0   | 3         | 1   | 2     | 1          | 12    |
| 9          | 2   | 3  | 2         | 0   | 2         | 1   | 2     | 0          | 12    |
| 10         | 1   | 2  | 2         | 0   | 4         | 2   | 3     | 1          | 15    |
| 11         | 3   | 2  | 3         | 0   | 3         | 1   | 2     | 1          | 15    |
| 12         | 1   | 2  | 2         | 0   | 2         | 1   | 2     | 0          | 10    |
| 13         | 2   | 3  | 2         | 0   | 2         | 1   | 2     | 0          | 12    |

Ischemic neuronal changes (INc); Neuronophagia (NF); Mononuclear cell infiltration (MCI); Endothelial cell swelling (ECS).

Supplementary Table S3. Immunohistochemistry scores in nonsurvivor calves with perinatal asphyxia.

| Animal no. | IHC score |
|------------|-----------|
| 1          | 2         |
| 2          | 3         |
| 3          | 1         |
| 4          | 2         |
| 5          | 2         |
| 6          | 1         |
| 7          | 2         |
| 8          | 0         |
| 9          | 1         |
| 10         | 3         |
| 11         | 2         |
| 12         | 1         |
| 13         | 1         |
| Average    | 1.61      |
